# Supplementary material for: Chemical compositions, antibacterial, antifungal and cytotoxic effects of Alhagi mannifera five extracts
Source: publisher site journal article supplement (doi:10.1515/jcim-2021-0206), 2021-08-12
Supplement: Supplementary file 1 [file j_jcim-2021-0206_suppl.docx]

**Chemical compositions, antibacterial, antifungal and cytotoxic effects of *Alhagi mannifera* five extracts**

**
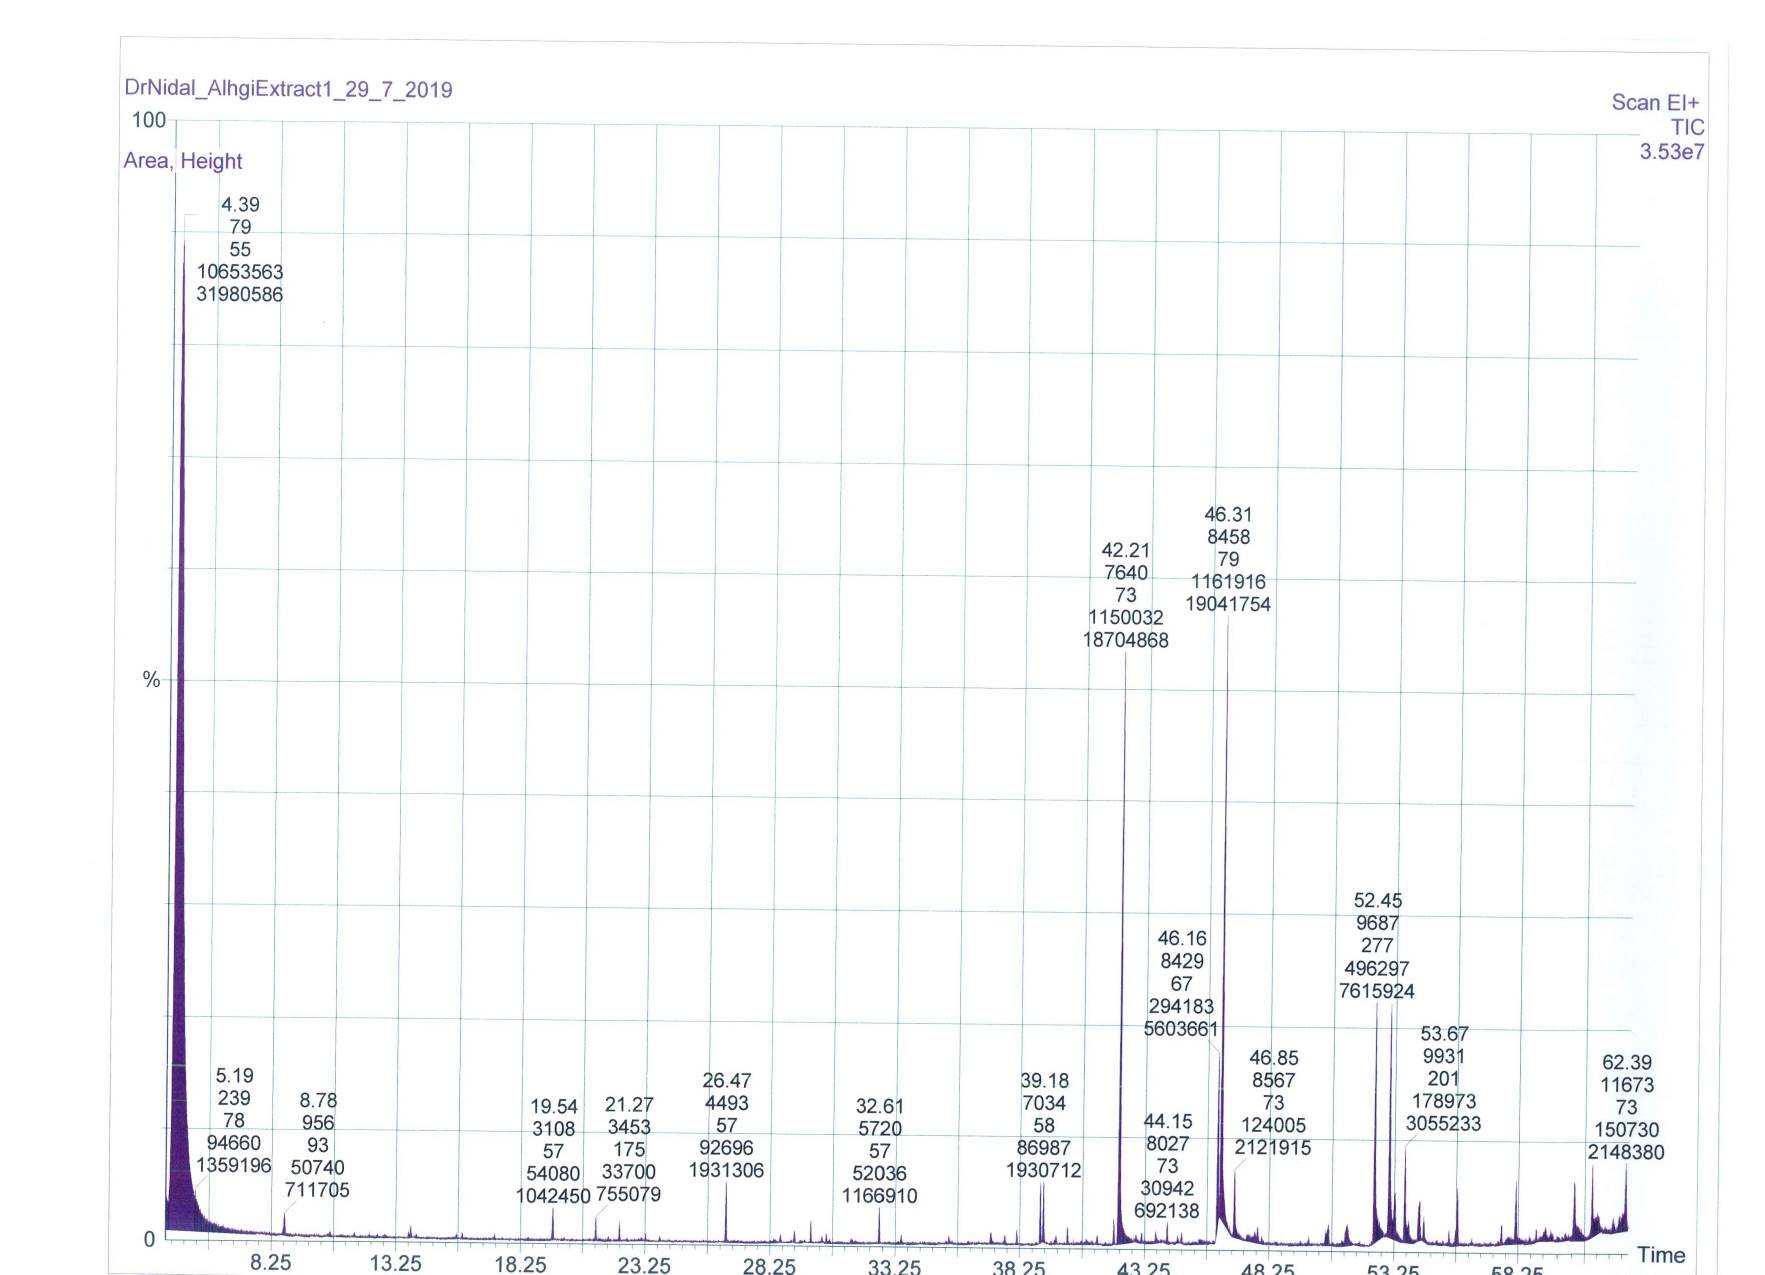
**

**Figure S1.** The GC-MS chromatogram of *A. mannifera* petroleum ether extract

**
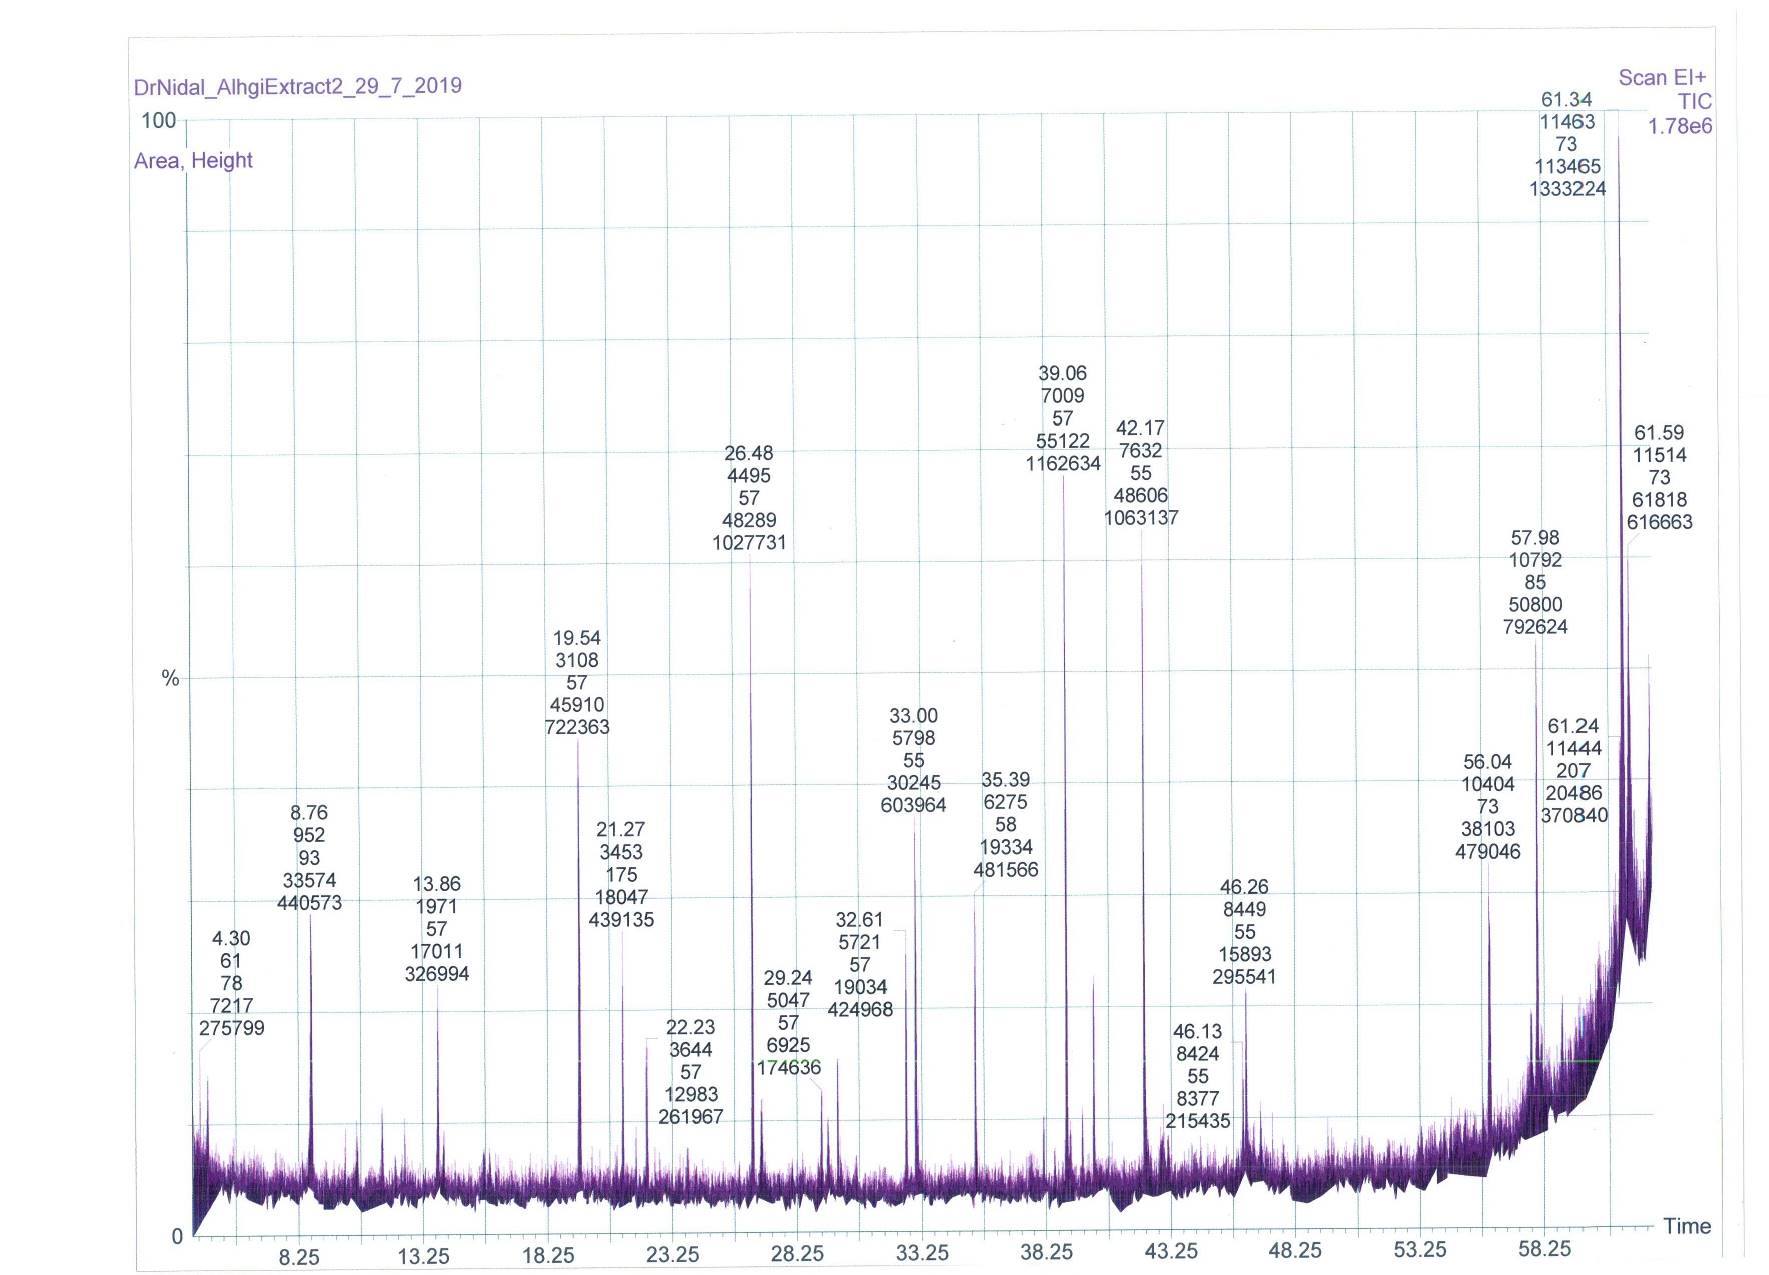
Figure S2.** The GC-MS chromatogram of *A. mannifera* methylene chloride extract

**
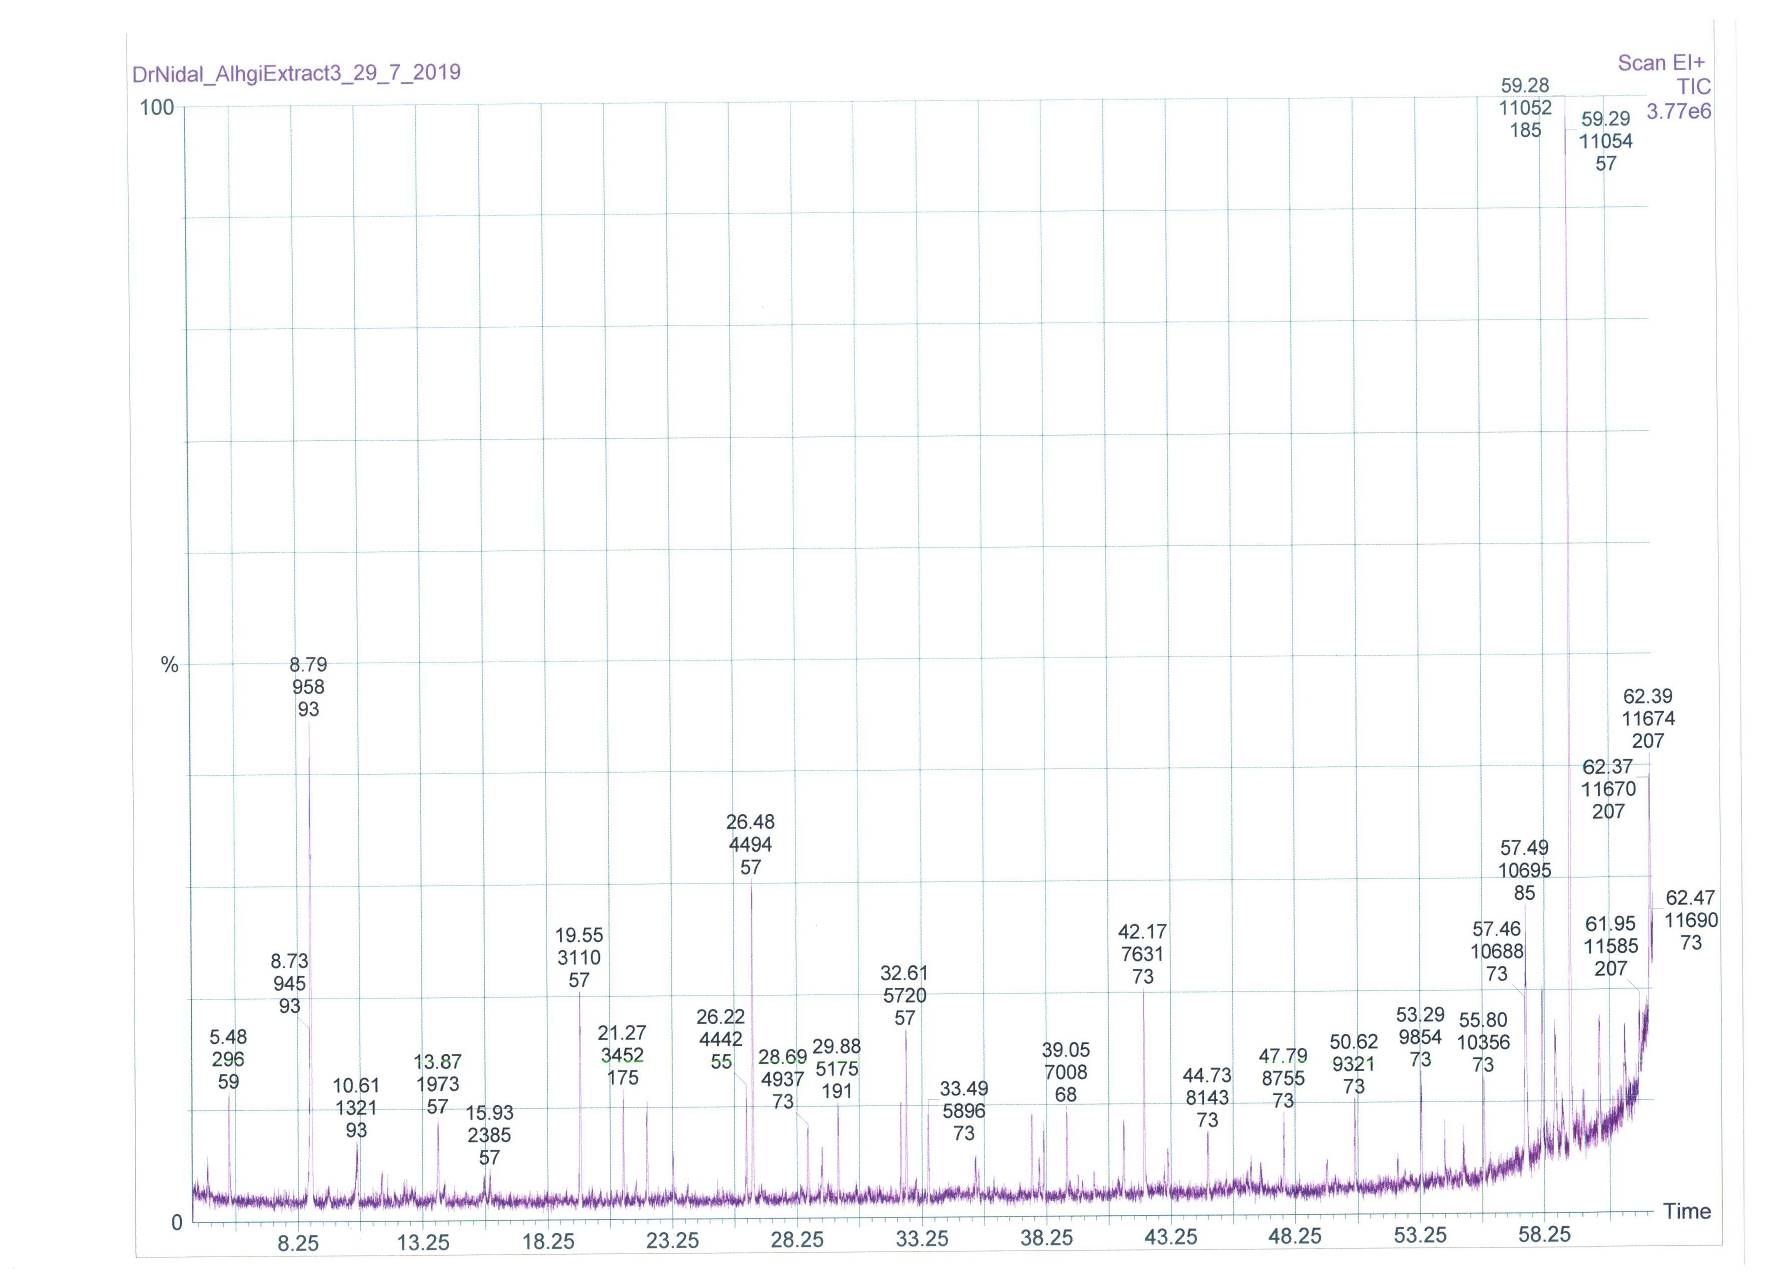
**

**Figure S3.** The GC-MS chromatogram of *A. mannifera* chloroform extract


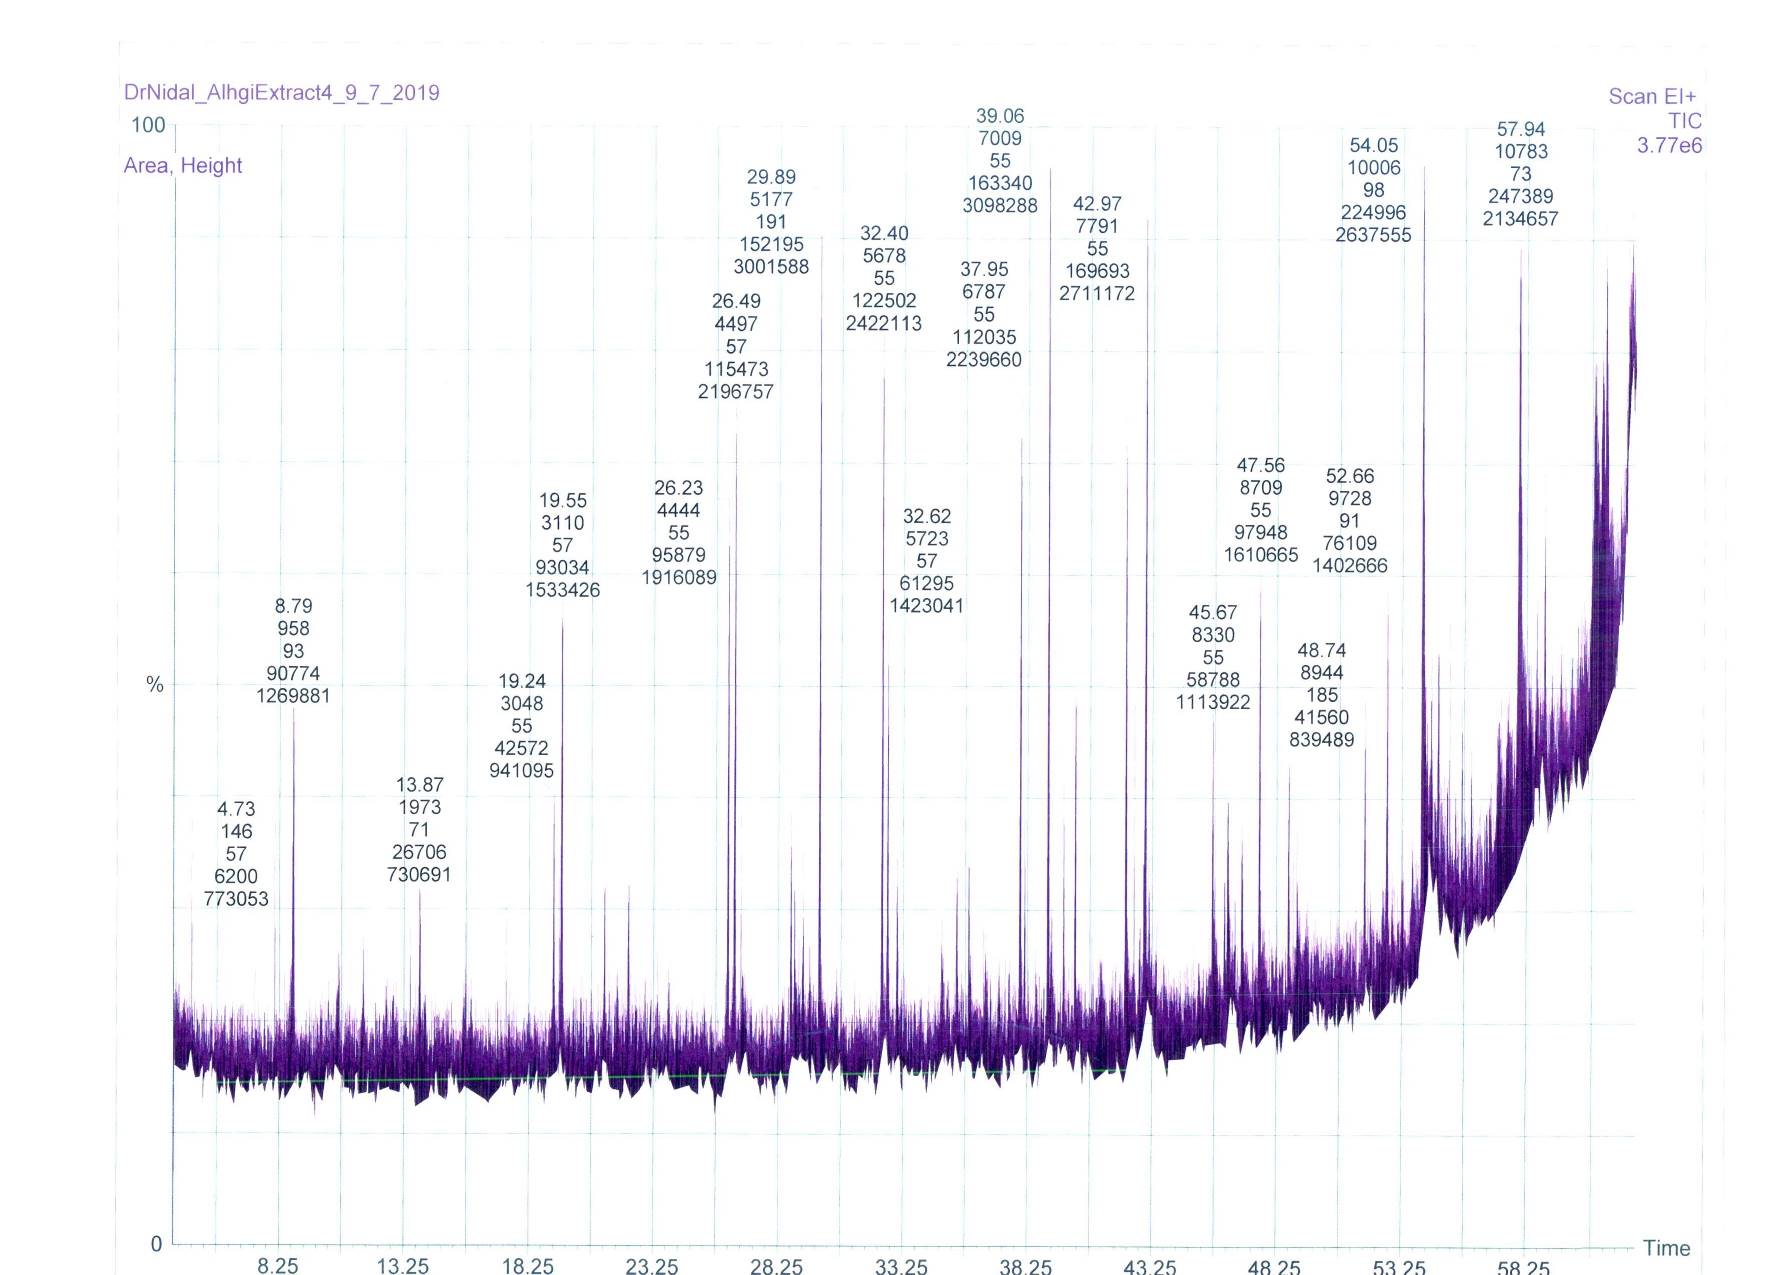


**Figure S4.** The GC-MS chromatogram of *A. mannifera* acetone extract


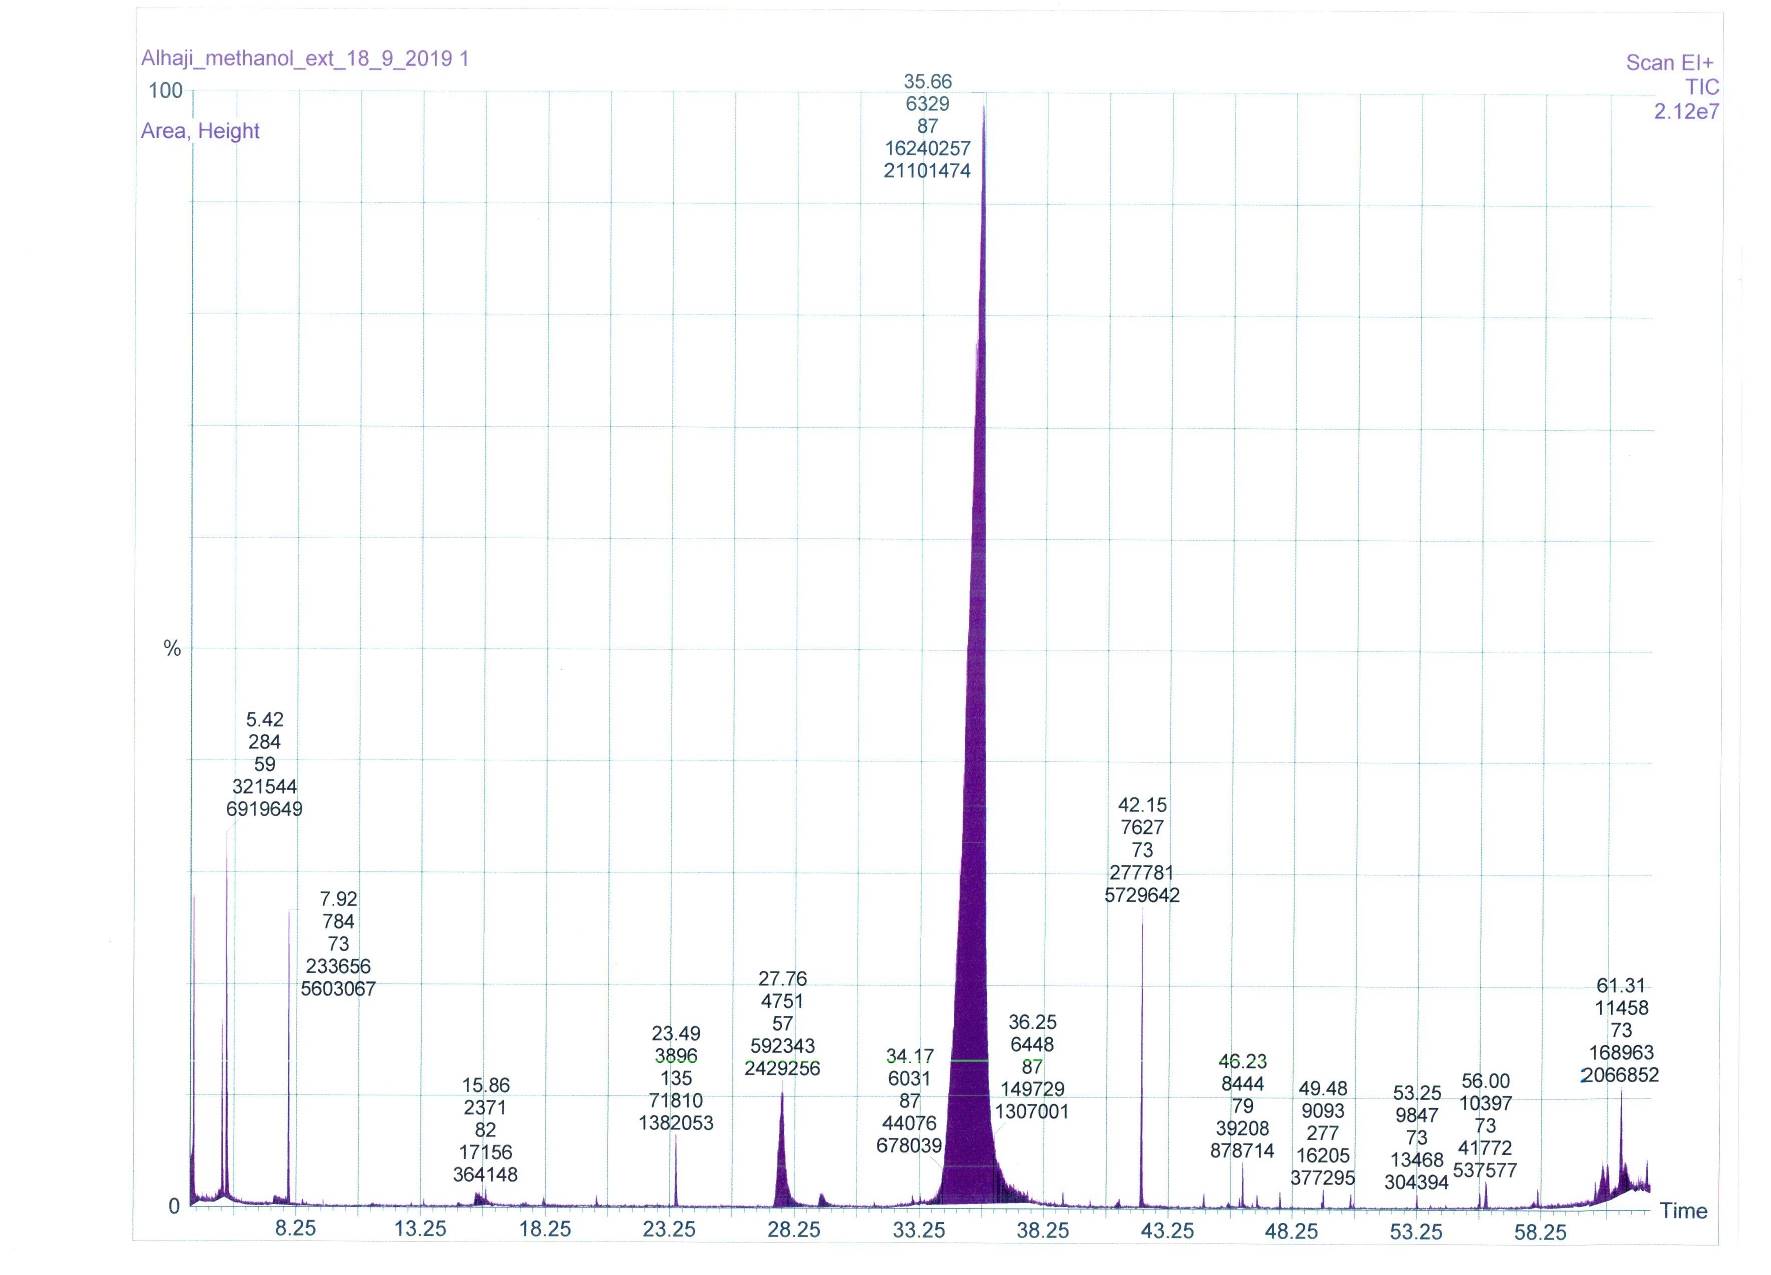


**Figure S5.** The GC-MS chromatogram of *A. mannifera* methanol extract
